# Supplementary material for: Assessing Cancer Risk Associated with Aquatic Polycyclic Aromatic Hydrocarbon Pollution Reveals Dietary Routes of Exposure and Vulnerable Populations
Source: J Environ Public Health. 2018 Sep 19;2018:5610462. doi: 10.1155/2018/5610462 (PMC6169233; doi:10.1155/2018/5610462)
Supplement: Supplementary Materials — Supplementary Table 1: AWI Superfund site cancer risk, hazard, and exposure acronym explanations, values, and data sources. Supplementary Table 2: raw exposure and cancer risk calculations for users of the AWI Superfund site by contaminant of concern. [file 5610462.f1.xlsx]

## Sheet: Table 1
SUPPLEMENTAL TABLE 1
Acronyms
Acronym	Explanation	Units	Source
CS	Chemical Concentration in Sediment	mg/kg	Chemical specific
IR-S	Ingestion Rate of Sediment	mg/day	USEPA, 2011; Professional Judgement
EF	Exposure Frequency	days/year	Professional Judgement
ED	Exposure Duration	years	USEPA, 2014
CF	Conversion Factor	kg/mg	-
BW	Body Weight	kg/mg	USEPA, 2014
AT	Average Time - Cancer	days	USEPA, 2014
CDI	Chronic Daily Intake	mg/kg-day	Calculated
AF	Soil to Skin Adherence Factor	mg/cm^2 - event	USEPA, 2014
ABSd	Dermal Absorption Fraction	-	USEPA, 2004
DAevent	Absorbed Dose per Event	mg/cm^2 - event	Calculated
EV	Event Frequency	events/day	Professional Judgement
SA	Skin Surface Area Available for Contact	cm^2	USEPA, 2014
DAD	Dermal Absorbed Dose (mg/kg-day)	mg/kg-day	Calculated
ADAF	Age-Dependent Adjustment Factor	-	USEPA, 2005
CSF	Cancer Slope Factor	mg/kg-day	USEPA 2014b; Knafla et al, 2006
COC	Contaminant of Concern	-	-

## Sheet: Table 2
SUPPLEMENTAL TABLE 2
Cancer risk calculations for the Superfund site
ORIGINAL SUPERFUND SITE RISK ASSESSMENT
	Adult Trespasser			Child Trespasser			Adult Recreational User			Child Recreational User				Total Cancer Risk from Superfund Site Assessment
Superfund site Sediment PAH Contaminant of Concern	Ingestion	Dermal	Total	Ingestion	Dermal	Total	Ingestion	Dermal	Total	Ingestion	Dermal	Total			BaA	BbF	Chr	BaP	BkF	Ind	Dib
Benz[a]anthracene	3.2e-05	7.6e-05	0.000108	7.8e-05	0.0029	0.002978	1.3e-05	9.6e-05	0.000109	3.6e-05	0.0032	0.003236		Adult Trespasser	0.000108	6.3e-05	1.14e-06	0.00063	4.3e-06	2.43e-05	0.000104
Benzo[b]fluoranthene	1.9e-05	4.4e-05	6.3e-05	4.5e-05	0.0017	0.001745	7.4e-06	5.5e-05	6.24e-05	2.1e-05	0.0018	0.001821		Child Trespasser	0.002978	0.001745	3.183e-05	0.01745	0.0001231	0.000688	0.002976
Chrysene	3.4e-07	8e-07	1.14e-06	8.3e-07	3.1e-05	3.183e-05	1.4e-07	1e-06	1.14e-06	3.8e-07	3.4e-05	3.438e-05		Adult Recreational User	0.000109	6.24e-05	1.14e-06	0.000624	4.31e-06	2.49e-05	0.000106
Benzo[a]pyrene	0.00019	0.00044	0.00063	0.00045	0.017	0.01745	7.4e-05	0.00055	0.000624	0.00021	0.018	0.01821		Child Recreational User	0.003236	0.001821	3.438e-05	0.01821	0.0001314	0.000736	0.003135
Benzo[k]fluoranthene	1.3e-06	3e-06	4.3e-06	3.1e-06	0.00012	0.0001231	5.1e-07	3.8e-06	4.31e-06	1.4e-06	0.00013	0.0001314
Indeno[1,2,3-c,d]pyrene	7.3e-06	1.7e-05	2.43e-05	1.8e-05	0.00067	0.000688	2.9e-06	2.2e-05	2.49e-05	6e-06	0.00073	0.000736
Dibenz[a,h]anthracene	3.1e-05	7.3e-05	0.000104	7.6e-05	0.0029	0.002976	1.3e-05	9.3e-05	0.000106	3.5e-05	0.0031	0.003135
DIRECT RISK ASSESSMENT PERFORMED IN THIS EXPERIMENT
Group	Exposure	Mean
Adult Trespasser	Oral	3.626e-09
	Dermal	3.42e-08
Child Trespasser	Oral	1.601e-07
	Dermal	6.739e-07
Adult Recreational User	Oral	2.462e-09
	Dermal	6.581e-08
Child Recreational User	Oral	1.476e-07
	Dermal	2.171e-07
Total PAH Mixture Cancer Risk
Group of Concern	Direct Exposure Assessment Performed in this Experiment	Original Risk Assessment
Adult Trespasser	3.7826e-08	0.00093474
Child Trespasser	8.34e-07	0.0259919
Adult Recreational User	6.8272e-08	0.00093175
Child Recreational User	3.647e-07	0.0273038

## Sheet: Table 3
SUPPLEMENTAL TABLE 3
USEtox intake factor and cancer cases raw data
CAS RN	Name	Intake fraction [kgintake/kgemitted]
	0.628571	Emission to continental freshwater							Emission to continental sea water							Emission to continental natural soil							Emission to continental agricultural soil
		inhalation	dr.water	abv.gr.prod.	blw.gr.prod.	meat	dairy	fish	inhalation	dr.water	abv.gr.prod.	blw.gr.prod.	meat	dairy	fish	inhalation	dr.water	abv.gr.prod.	blw.gr.prod.	meat	dairy	fish	inhalation	dr.water	abv.gr.prod.	blw.gr.prod.	meat	dairy	fish
50-32-8	benzo[a]pyrene	2.86787e-09	8.09793e-06	3.48622e-07	2.00643e-09	7.91007e-07	2.074e-06	2.66948e-05	1.43811e-09	1.03825e-10	1.74827e-07	2.15975e-10	6.19273e-09	1.62013e-08	1.14547e-05	1.10006e-10	4.18237e-09	1.33725e-08	1.73319e-11	8.75082e-10	2.29174e-09	1.38272e-08	1.10007e-10	4.18237e-09	1.33828e-08	2.2052e-06	6.26125e-07	1.2899e-06	1.38272e-08
53-70-3	Dibenz(a,h)anthracene	4.83582e-10	6.25844e-06	5.54465e-08	4.10873e-09	2.98021e-06	7.81184e-06	0.000154782	3.73541e-10	2.99008e-11	4.28332e-08	2.11341e-10	4.55665e-09	1.17681e-08	0.000100749	4.24816e-11	9.80023e-09	4.87082e-09	3.00354e-11	5.17411e-09	1.35429e-08	2.42565e-07	4.2482e-11	9.80023e-09	4.87385e-09	3.96539e-06	5.9057e-06	1.21648e-05	2.42565e-07
56-55-3	Benz[a]anthracene	7.93081e-08	2.79808e-05	9.51856e-06	5.96481e-08	1.11617e-06	2.92561e-06	6.06812e-05	2.11883e-08	3.93379e-09	2.54324e-06	1.0486e-08	5.41904e-08	1.41844e-07	1.36322e-05	5.8462e-09	3.75371e-08	7.01658e-07	2.91937e-09	1.61412e-08	4.2255e-08	8.32742e-08	5.84625e-09	3.75371e-08	7.01806e-07	1.46762e-05	5.77385e-07	1.19806e-06	8.32742e-08
193-39-5	Indeno[1,2,3-cd]-pyrene	5.89496e-09	2.98538e-05	7.05249e-07	9.10799e-08	8.46571e-06	2.21882e-05	0.000170543	1.80581e-09	5.39681e-10	2.16073e-07	4.39792e-09	2.2519e-08	5.84507e-08	4.22512e-05	7.63596e-10	8.62441e-08	9.1352e-08	2.08004e-09	3.3702e-08	8.80954e-08	4.93779e-07	7.63603e-10	8.62441e-08	9.13717e-08	2.81258e-05	6.70487e-06	1.38264e-05	4.93779e-07
205-99-2	Benzo[b]fluoranthene	5.32593e-08	7.86734e-05	6.45434e-06	5.49232e-07	2.59883e-06	6.81059e-06	0.000872416	7.72499e-09	6.02225e-09	9.36325e-07	4.22302e-08	2.19517e-08	5.7209e-08	0.00010219	6.947e-09	3.65784e-07	8.41878e-07	3.91555e-08	3.09544e-08	8.08439e-08	4.07947e-06	6.94706e-09	3.65784e-07	8.4254e-07	7.42618e-05	1.10172e-06	2.28593e-06	4.07947e-06
207-08-9	Benzo[k]fluoranthene	2.38873e-08	9.29921e-05	2.89464e-06	1.27928e-06	2.97201e-06	7.78335e-06	0.000305157	4.28623e-09	4.58701e-09	5.19565e-07	7.12921e-08	1.291e-08	3.32682e-08	4.00652e-05	7.38429e-09	1.24065e-06	8.94798e-07	1.34391e-07	6.0688e-08	1.58043e-07	4.08118e-06	7.38435e-09	1.24065e-06	8.96699e-07	0.000214886	3.15877e-06	6.53811e-06	4.08118e-06
218-01-9	Chrysene	1.29814e-07	7.36172e-05	1.55884e-05	9.30263e-07	1.57202e-06	4.11887e-06	0.001407	2.20674e-08	1.21626e-08	2.65039e-06	9.41477e-08	3.95479e-08	1.03335e-07	0.000190653	2.65379e-08	5.54657e-07	3.18671e-06	1.15919e-07	5.73856e-08	1.50027e-07	1.0726e-05	2.65381e-08	5.54657e-07	3.1888e-06	0.00012812	8.95744e-07	1.87652e-06	1.0726e-05
	SUM	2.95515e-07	0.000317474	3.55652e-05	2.91562e-06	2.0496e-05	5.37125e-05	0.00299727	5.88844e-08	2.73791e-08	7.08325e-06	2.22981e-07	1.61868e-07	4.22077e-07	0.000500996	4.76315e-08	2.29885e-06	5.73464e-06	2.94512e-07	2.0492e-07	5.35099e-07	1.97201e-05	4.76319e-08	2.29885e-06	5.73947e-06	0.000466241	1.89703e-05	3.91797e-05	1.97201e-05
Midpoint Human health characterization factor (cases/kg emitted)						Endpoint Human health characterization factor (DALY/kg emitted)
	Emission to:						Emission to:
Compound	Cont. freshwater	Cont. sea water	Cont. natural soil	Cont. agric. Soil		Compound	Cont. freshwater	Cont. sea water	Cont. natural soil	Cont. agric. Soil
BaP	0.00277	0.000851	2.53e-06	0.000303		BaP	0.0319105	0.00978326	2.91107e-05	0.00348622
BaA	0.000747	0.00012	6.49e-06	0.000126		BaA	0.00859323	0.00137738	7.46845e-05	0.00145067
BbF	0.00706	0.000754	3.97e-05	0.000605		BbF	0.0812263	0.00866882	0.00045711	0.00696316
BkF	0.00302	0.000297	4.8e-05	0.00168		BkF	0.0346799	0.0034177	0.000552151	0.0193764
Chr	0.0011	0.000141	1.08e-05	0.000106		Chr	0.0126173	0.00162506	0.000124391	0.00122054
Dib	0.0125	0.00736	2.01e-05	0.00163		Dib	0.144304	0.084629	0.000231724	0.0187151
Ind	0.00169	0.000311	5.81e-06	0.00036		Ind	0.0194641	0.00357249	6.68255e-05	0.00414119
SUM	0.028887	0.009834	0.00013343	0.00481		SUM	0.332795	0.113074	0.001536	0.0553533
